# Supplementary material for: Adult and adolescent exposure to tobacco and alcohol content in contemporary YouTube music videos in Great Britain: a population estimate
Source: PubMed Central journal article supplement (PMC4853525; doi:10.1136/jech-2015-206402), 2016-01-14
Supplement: jech-2015-206402-s1.pdf [file jech-2015-206402-s1.pdf]

## Appendix 1: General Characteristics of the Sample

|                    | Percentage<br>watched<br>any<br>(95% CI) | Percentage<br>rewatched any<br>(95% CI) | Average number of<br>videos watched<br>(95% CI) | Observations<br>[%] |
|--------------------|------------------------------------------|-----------------------------------------|-------------------------------------------------|---------------------|
| <b>Adolescents</b> | 81.3<br>(79.7-83.0)                      | 86.9<br>(85.3-88.5)                     | 7.2<br>(6.8-7.5)                                | 2,068<br>[100%]     |
| Female             | 90.0<br>(88.2-91.8)                      | 89.4<br>(87.4-91.4)                     | 8.9<br>(8.4-9.3)                                | 1,058<br>[48.8%]    |
| Male               | 72.3<br>(69.5-75.0)                      | 83.3<br>(81.0-86.4)                     | 5.4<br>(5.0-5.7)                                | 1,010<br>[51.2%]    |
| <b>Adults</b>      | 40.4<br>(38.3-42.4)                      | 75.5<br>(72.7-78.3)                     | 1.9<br>(1.8-2.1)                                | 2,232<br>[100%]     |
| Female             | 43.1<br>(40.3-46.0)                      | 73.9<br>(70.0-77.7)                     | 2.3<br>(2.1-2.6)                                | 1,180<br>[47.1%]    |
| Male               | 37.7<br>(34.3-40.2)                      | 77.6<br>(73.4-81.7)                     | 1.5<br>(1.3-1.7)                                | 1,052<br>[52.9%]    |
| <b>Age Groups</b>  |                                          |                                         |                                                 |                     |
| 11-12              | 78.0<br>(74.5-81.5)                      | 88.3<br>(85.2-91.4)                     | 6.2<br>(5.6-6.7)                                | 537<br>[12.5%]      |
| 13-15              | 81.6<br>(79.0-84.3)                      | 88.2<br>(85.2-90.7)                     | 7.8<br>(7.3-8.4)                                | 811<br>[18.9%]      |
| 16-18              | 83.5<br>(80.8-86.2)                      | 84.5<br>(81.6-87.4)                     | 7.2<br>(6.6-7.7)                                | 720<br>[16.7%]      |
| 19-24              | 74.5<br>(69.4-79.6)                      | 80.8<br>(75.4-86.1)                     | 4.8<br>(4.1-5.4)                                | 286<br>[6.7%]       |
| 25-34              | 62.5<br>(56.9-68.0)                      | 77.0<br>(70.9-83.2)                     | 3.3<br>(2.7-3.8)                                | 293<br>[6.8%]       |
| 35-44              | 52.2<br>(47.1-57.3)                      | 73.7<br>(67.5-80.0)                     | 2.2<br>(1.8-2.7)                                | 372<br>[8.7%]       |
| 45-54              | 35.4<br>(31.1-39.7)                      | 73.7<br>(66.9-80.4)                     | 1.4<br>(1.1-1.7)                                | 472<br>[10.9%]      |
| 55+                | 17.8<br>(15.2-20.4)                      | 70.1<br>(32.6-77.7)                     | 0.6<br>(0.5-0.8)                                | 809<br>[18.8%]      |
