# Supplementary material for: Adult and adolescent exposure to tobacco and alcohol content in contemporary YouTube music videos in Great Britain: a population estimate
Source: PubMed Central journal article supplement (PMC4853525; doi:10.1136/jech-2015-206402), 2016-01-14
Supplement: jech-2015-206402-s3.pdf [file jech-2015-206402-s3.pdf]

|                                      | Month since video was released |        | Gross impression (in millions) |                        |                           |                        | Gross Impressions (per capita) |                     |                        |                     |
|--------------------------------------|--------------------------------|--------|--------------------------------|------------------------|---------------------------|------------------------|--------------------------------|---------------------|------------------------|---------------------|
|                                      |                                |        | Adolescents                    |                        | Adults                    |                        | Adolescents                    |                     | Adults                 |                     |
| Genre/Music Video Title              | Adolescents                    | Adults | Alcohol (95% CI)               | Tobacco (95% CI)       | Alcohol (95% CI)          | Tobacco (95% CI)       | Alcohol (95% CI)               | Tobacco (95% CI)    | Alcohol (95% CI)       | Tobacco (95% CI)    |
| Pop/R&B/Soul                         | 6.5                            | 10.3   | 261.61<br>(257.11-266.11)      | 38.25<br>(37.59-38.90) | 642.43<br>(620.58-664.28) | 93.92<br>(90.73-97.12) | 44.23<br>(43.47-44.99)         | 6.47<br>(6.36-6.58) | 13.06<br>(12.61-13.50) | 1.91<br>(1.84-1.97) |
| The Story Of My Life (One Direction) | 5.0                            | 8.5    | 7.14<br>(6.76-7.51)            | 0                      | 16.99<br>(15.04-18.95)    | 0                      | 1.21<br>(1.14-1.27)            | 0                   | 0.35<br>(0.31-0.39)    | 0                   |
| Royals (Lorde)                       | 10.8                           | 14.3   | 16.38<br>(15.41-17.35)         | 2.05<br>(1.93-2.17)    | 37.21<br>(32.43-41.99)    | 4.65<br>(4.05-5.25)    | 2.77<br>(2.61-2.93)            | 0.35<br>(0.33-0.37) | 0.76<br>(0.66-0.85)    | 0.09<br>(0.08-0.11) |
| Love Me Again (John Newman)          | 10.9                           | 14.4   | 22.31<br>(20.65-23.97)         | 4.46<br>(4.13-4.79)    | 59.84<br>(51.48-68.21)    | 11.97<br>(10.30-13.64) | 3.77<br>(3.49-4.05)            | 0.75<br>(0.70-0.81) | 1.22<br>(1.05-1.39)    | 0.24<br>(0.21-0.28) |
| Timber (Pitbull ft Kesha)            | 4.2                            | 7.7    | 44.47<br>(41.71-47.22)         | 0                      | 118.12<br>(103.76-132.49) | 0                      | 7.52<br>(7.05-7.98)            | 0                   | 2.40<br>(2.11-2.69)    | 0                   |
| One More Sleep (Leona Lewis)         | 4.1                            | 7.6    | 5.67<br>(5.05-6.28)            | 0                      | 13.73<br>(10.93-16.53)    | 0                      | 0.96<br>(0.85-1.06)            | 0                   | 0.28<br>(0.22-0.34)    | 0                   |
| Can We Dance (The Vamps)             | 7.9                            | 11.4   | 9.61<br>(8.79-10.43)           | 0                      | 16.58<br>(13.29-19.86)    | 0                      | 1.63<br>(1.49-1.76)            | 0                   | 0.34<br>(0.27-0.40)    | 0                   |
| Best Song Ever (One Direction)       | 8.4                            | 11.9   | 47.27<br>(44.88-49.67)         | 0                      | 98.84<br>(86.90-110.77)   | 0                      | 7.99<br>(7.59-8.40)            | 0                   | 2.01<br>(1.77-2.25)    | 0                   |
| You're Nobody 'Til                   | 6.5                            | 10.0   | 11.97                          | 0                      | 25.79                     | 0                      | 2.02                           | 0                   | 0.52                   | 0                   |

|                                                       |      |      |                        |                        |                         |                        |                     |                     |                     |                     |
|-------------------------------------------------------|------|------|------------------------|------------------------|-------------------------|------------------------|---------------------|---------------------|---------------------|---------------------|
| Somebody Loves You<br>(James Arthur)                  |      |      | (11.01-12.93)          |                        | (21.48-30.09)           |                        | (1.86-2.19)         |                     | (0.44-0.61)         |                     |
| It's My Party (Jessie J)                              | 7.9  | 11.4 | 13.89<br>(13.05-14.74) | 0                      | 25.15<br>(21.43-28.87)  | 0                      | 2.35<br>(2.21-2.49) | 0                   | 0.51<br>(0.44-0.59) | 0                   |
| Juliet (Lawson)                                       | 7.1  | 10.6 | 18.12<br>(16.18-20.06) | 4.12<br>(3.68-4.56)    | 27.16<br>(20.13-34.18)  | 6.17<br>(4.57-7.77)    | 3.06<br>(2.74-3.39) | 0.70<br>(0.62-0.77) | 0.55<br>(0.41-0.69) | 0.13<br>(0.09-0.16) |
| Trumpets (Jason Derulo)                               | 4.9  | 8.4  | 5.26<br>(4.91-5.61)    | 12.27<br>(11.46-13.09) | 10.51<br>(8.94-12.09)   | 24.53<br>(20.85-28.21) | 0.89<br>(0.83-0.95) | 2.07<br>(1.94-2.21) | 0.21<br>(0.18-0.25) | 0.50<br>(0.42-0.57) |
| Bonfire Heart (James<br>Blunt)                        | 7.2  | 10.7 | 4.89<br>(4.42-5.36)    | 0.98<br>(0.88-1.07)    | 12.56<br>(10.32-14.81)  | 2.51<br>(2.06-2.96)    | 0.83<br>(0.75-0.91) | 0.17<br>(0.15-0.18) | 0.26<br>(0.21-0.30) | 0.05<br>(0.04-0.06) |
| Braveheart (Neon Jungle)                              | 3.7  | 7.2  | 0                      | 0.75<br>(0.66-0.83)    | 0                       | 1.34<br>(1.01-1.68)    | 0                   | 0.13<br>(0.11-0.14) | 0                   | 0.03<br>(0.02-0.03) |
| R U Crazy (Conor Maynard)                             | 7.3  | 10.8 | 2.40<br>(2.20-2.61)    | 6.01<br>(5.49-6.52)    | 3.04<br>(2.33-3.75)     | 7.60<br>(5.84-9.37)    | 0.41<br>(0.37-0.44) | 1.02<br>(0.93-1.10) | 0.06<br>(0.05-0.08) | 0.15<br>(0.12-0.19) |
| Work B**ch (Britney<br>Spears)                        | 6.1  | 9.6  | 5.10<br>(4.56-5.63)    | 0                      | 16.13<br>(13.35-18.92)  | 0                      | 0.86<br>(0.77-0.95) | 0                   | 0.33<br>(0.27-0.38) | 0                   |
| Drunk In Love (Beyonce ft,<br>Jay Z)                  | 3.5  | 7.0  | 32.43<br>(30.08-34.78) | 1.54<br>(1.43-1.66)    | 98.13<br>(85.55-110.71) | 4.67<br>(4.07-5.27)    | 5.48<br>(5.09-5.88) | 0.26<br>(0.24-0.28) | 1.99<br>(1.74-2.25) | 0.09<br>(0.08-0.11) |
| Hard Out Here (Lilly Allen)                           | 4.7  | 8.2  | 9.55<br>(8.67-10.43)   | 0                      | 22.22<br>(18.20-26.23)  | 0                      | 1.62<br>(1.47-1.76) | 0                   | 0.45<br>(0.37-0.53) | 0                   |
| Blurred Lines (Robin Thicke<br>ft, Pharrell Williams) | 12.6 | 16.1 | 11.67<br>(11.16-12.18) | 2.92<br>(2.79-3.04)    | 50.17<br>(46.61-53.73)  | 12.54<br>(11.65-13.43) | 1.97<br>(1.89-2.06) | 0.49<br>(0.47-0.51) | 1.02<br>(0.95-1.09) | 0.25<br>(0.24-0.27) |

|                                                  |      |      |                        |                        |                        |                        |                     |                     |                     |                     |
|--------------------------------------------------|------|------|------------------------|------------------------|------------------------|------------------------|---------------------|---------------------|---------------------|---------------------|
| Dance/House                                      | 5.9  | 9.5  | 30.35<br>(29.22-34.48) | 3.25<br>(3.13-3.37)    | 65.21<br>(60.26-70.17) | 6.99<br>(6.46-7.52)    | 5.13<br>(4.94-5.32) | 0.55<br>(0.53-0.57) | 1.33<br>(1.22-1.43) | 0.14<br>(0.13-0.15) |
| Under Control (Calvin Harris & Alesso ft, Hurts) | 5.4  | 8.9  | 2.13<br>(1.88-2.38)    | 0                      | 3.90<br>(2.92-4.88)    | 0                      | 0.36<br>(0.32-0.40) | 0                   | 0.08<br>(0.06-0.10) | 0                   |
| Animals (Martin Garrix)                          | 9.6  | 13.1 | 1.84<br>(1.65-2.02)    | 0                      | 3.39<br>(2.65-4.14)    | 0                      | 0.31<br>(0.28-0.34) | 0                   | 0.07<br>(0.05-0.08) | 0                   |
| Rather Be (Clean Bandit ft, Jess Glynne)         | 3.9  | 7.4  | 3.10<br>(2.81-3.39)    | 1.03<br>(0.94-1.13)    | 8.00<br>(6.61-9.39)    | 2.67<br>(2.20-3.13)    | 0.52<br>(0.47-0.57) | 0.17<br>(0.16-0.19) | 0.16<br>(0.13-0.19) | 0.05<br>(0.04-0.06) |
| Hey Brother (Avicii)                             | 3.7  | 7.3  | 2.07<br>(1.95-2.20)    | 4.15<br>(3.90-4.39)    | 5.03<br>(4.41-5.64)    | 10.05<br>(8.81-11.29)  | 0.35<br>(0.33-0.37) | 0.70<br>(0.66-0.74) | 0.10<br>(0.09-0.11) | 0.20<br>(0.18-0.23) |
| You Make Me (Avicii)                             | 6.6  | 10.1 | 22.70<br>(20.89-24.52) | 0                      | 47.96<br>(39.89-56.04) | 0                      | 3.84<br>(3.53-4.15) | 0                   | 0.97<br>(0.81-1.14) | 0                   |
| Boo Yah (Showtek/ We Are Loved/ Wilson)          | 6.5  | 10.0 | 0.87<br>(0.74-1.00)    | 0                      | 0.93<br>(0.53-1.32)    | 0                      | 0.15<br>(0.12-0.17) | 0                   | 0.02<br>(0.02-0.01) | 0                   |
| Electronic/Alternative                           | 8.4  | 11.9 | 17.24<br>(16.45-18.03) | 15.08<br>(14.40-15.77) | 33.50<br>(30.21-36.80) | 29.32<br>(26.43-32.20) | 2.91<br>(2.78-3.05) | 2.55<br>(2.43-2.67) | 0.68<br>(0.61-0.75) | 0.60<br>(0.54-0.65) |
| Of The Night (Bastille)                          | 5.8  | 9.3  | 3.56<br>(3.25-3.87)    | 4.75<br>(4.34-5.16)    | 5.42<br>(4.27-6.57)    | 7.23<br>(5.69-8.77)    | 0.60<br>(0.55-0.65) | 0.80<br>(0.73-0.87) | 0.11<br>(0.09-0.13) | 0.15<br>(0.12-0.18) |
| Pompeii (Bastille)                               | 14.5 | 18.0 | 7.72<br>(7.24-8.20)    | 1.93<br>(1.81-2.05)    | 18.16<br>(15.80-20.53) | 4.54<br>(3.95-5.13)    | 1.31<br>(1.22-1.39) | 0.33<br>(0.31-0.35) | 0.37<br>(0.32-0.42) | 0.09<br>(0.08-0.10) |
| Count On Me (Chase & Status)                     | 6.4  | 9.9  | 2.23<br>(1.93-2.53)    | 4.46<br>(3.86-5.06)    | 3.88<br>(2.74-5.02)    | 7.76<br>(5.49-10.03)   | 0.38<br>(0.33-0.43) | 0.75<br>(0.65-0.86) | 0.08<br>(0.06-0.10) | 0.16<br>(0.11-0.20) |

|                                                      |      |      |                        |                     |                        |                     |                     |                     |                     |                     |
|------------------------------------------------------|------|------|------------------------|---------------------|------------------------|---------------------|---------------------|---------------------|---------------------|---------------------|
| Afterglow (Wilkinson)                                | 6.8  | 10.3 | 3.17<br>(2.78-3.57)    | 0.64<br>(0.56-0.71) | 5.29<br>(3.81-6.77)    | 1.06<br>(0.76-1.35) | 0.54<br>(0.47-0.60) | 0.11<br>(0.09-0.12) | 0.11<br>(0.08-0.14) | 0.02<br>(0.02-0.03) |
| Hip-hop                                              | 8.9  | 12.4 | 17.89<br>(17.03-18.75) | 4.97<br>(4.73-5.21) | 24.70<br>(21.67-27.72) | 6.86<br>(6.02-7.70) | 3.02<br>(2.88-3.17) | 0.84<br>(0.80-0.88) | 0.50<br>(0.44-0.56) | 0.14<br>(0.12-0.16) |
| Berzerk (Eminem)                                     | 6.8  | 10.3 | 0                      | 1.99<br>(1.80-2.18) | 0                      | 2.34<br>(1.71-2.96) | 0                   | 0.34<br>(0.30-0.37) | 0                   | 0.05<br>(0.03-0.06) |
| Hold On We're Going Home (Drake ft, Majid Jordan)    | 6.3  | 9.8  | 13.85<br>(12.52-15.19) | 2.97<br>(2.68-3.25) | 17.59<br>(13.08-22.10) | 3.77<br>(2.80-4.74) | 2.34<br>(2.12-2.57) | 0.50<br>(0.45-0.55) | 0.36<br>(0.27-0.45) | 0.08<br>(0.06-0.10) |
| Rap God (Eminem)                                     | 4.2  | 7.7  | 0.92<br>(0.83-1.02)    | 0                   | 1.21<br>(0.90-1.53)    | 0                   | 0.16<br>(0.14-0.17) | 0                   | 0.02<br>(0.02-0.03) | 0                   |
| Same Love (Macklemore & Ryan Lewis ft, Mary Lambert) | 18.2 | 21.7 | 3.20<br>(2.91-3.49)    | 0                   | 5.55<br>(4.39-6.72)    | 0                   | 0.54<br>(0.49-0.59) | 0                   | 0.11<br>(0.09-0.14) | 0                   |

**Note:** Population of adolescents is 5.91 million and adults, 49.20 million.

**Online Table 2:** Gross Impressions in Millions and Per Capita for Adults and Adolescents by Music Video and Genre
